# Supplementary material for: Electrogenerated chemiluminescence determination of C-reactive protein with carboxyl CdSe/ZnS core/shell quantum dots
Source: Royal Society of Chemistry journal article supplement (doi:10.1039/c0cp00545b), 2010-01-01
Supplement: c0cp00545b.pdf [file c0cp00545b.pdf]

## Electronic Supplementary Information (ESI):

# Electrogenerated chemiluminescence determination of C-reactive protein with carboxyl CdSe/ZnS core/shell quantum dots

Shijun Wang<sup>§</sup>, Emma Harris<sup>§</sup>, Jian Shi<sup>§,‡</sup>, Alfred Chen<sup>§</sup>, Suman Parajuli<sup>§</sup>, Xiaohui Jing<sup>§,‡</sup>, and Wujian Miao<sup>§\*</sup>

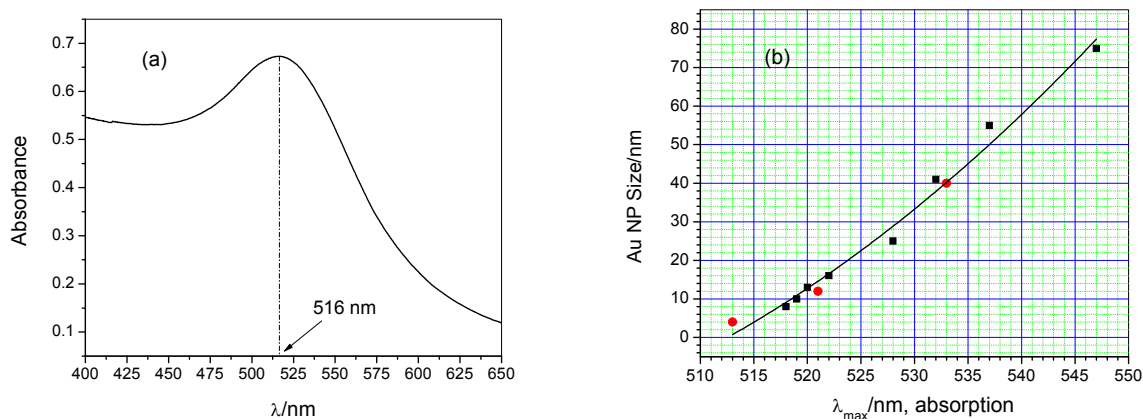

**Figure S1.** (a) UV-Visible spectra of Au NPs, (b) correlation between the Au NP size and the maximum absorption of UV-visible spectra of Au NPs.<sup>1, 2</sup>

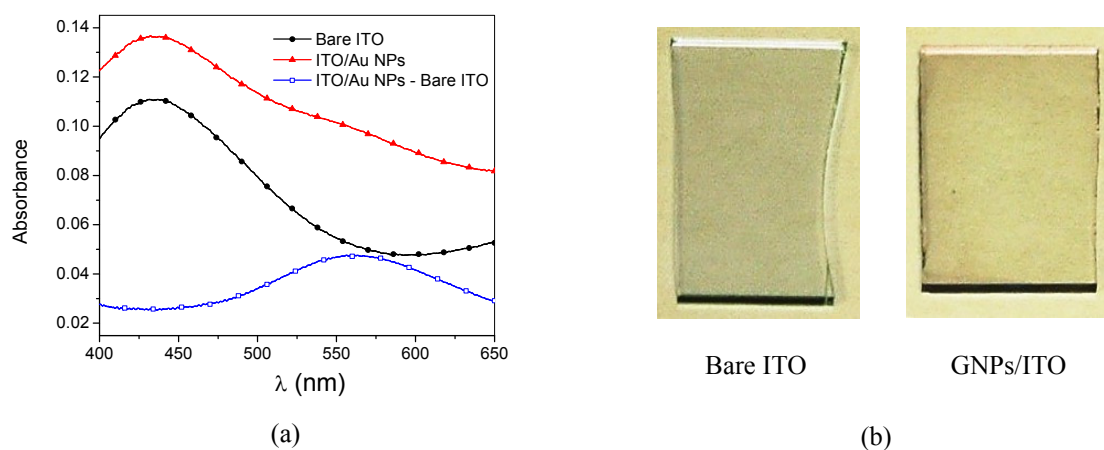

**Figure S2.** (a) UV-Visible spectra and (b) photographs of ITO electrodes before and after the immobilization of Au NPs.

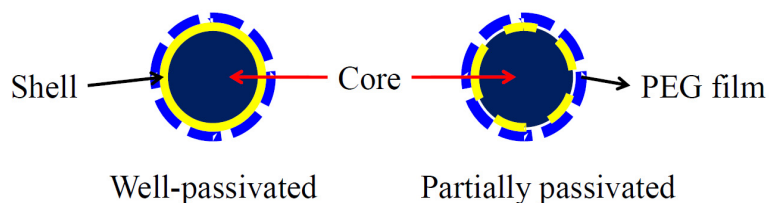

**Figure S3.** Illustration of the passivation status of Qdot 625.

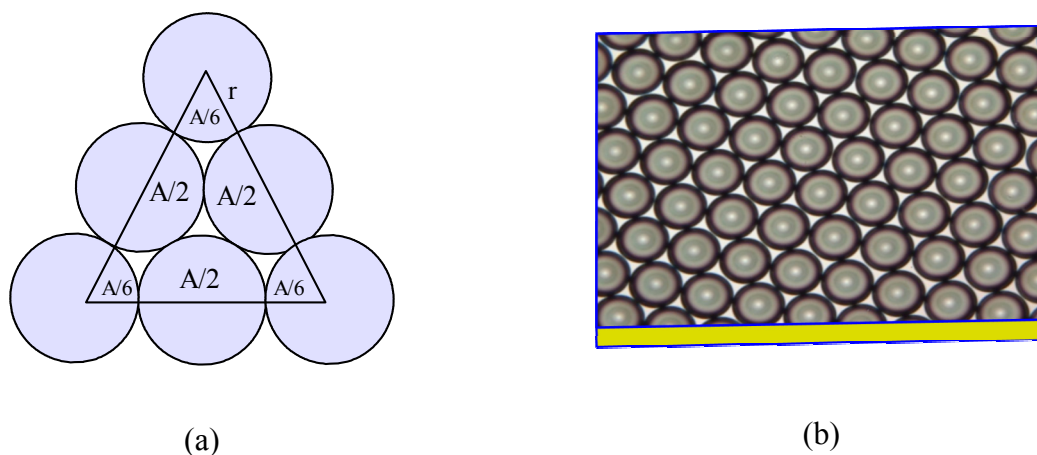

**Figure S4.** A close-packed plane: (a) illustration of the area calculation, (b) demonstration of MBs closely packed on the surface of a Au/CD electrode.

<sup>§</sup> Department of Chemistry and Biochemistry, The University of Southern Mississippi, Hattiesburg, MS 39406, U.S.A. Fax: +1-601-266 6075; Tel: +1-601-266 4716; E-mail: wujian.miao@usm.edu

<sup>‡</sup> Visiting scholars from School of Chemistry and Chemical Engineering, Nantong University, Nantong, China

## References

- 1 C. K. Kim, R. R. Kalluru, J. P. Singh, A. Fortner, J. Griffin, G. K. Darbha and P. C. Ray, *Nanotechnology*, 2006, **17**, 3085.
- 2 Z. Chen and Y. Zu, *Langmuir*, 2007, **23**, 11387-11390.
